# Supplementary material
Source: MDPI journal article supplement (https://www.mdpi.com/2227-7102/13/6/612)
Supplement: s1 [file s1 › education-2404007-supplementary.pdf]

# Soft Skills and Study-Related Factors: Direct and Indirect Associations with Academic Achievement and General Distress in University Students

**Table S1**

*Complete Information for the Measures considered in the Study*

| Measure                 | Response scale | Cronbach's $\alpha$ (original version)                                      | Cronbach's $\alpha$ (present sample)                                  |
|-------------------------|----------------|-----------------------------------------------------------------------------|-----------------------------------------------------------------------|
| Epistemic Curiosity     | 1–5            | .82 (Litman, 2008)                                                          | .81                                                                   |
| Creativity              | 1–5            | .88 (Feraco et al., 2021)                                                   | .88                                                                   |
| Critical Thinking       | 1–7            | .67–.92 (Moretti et al., 2018)                                              | .81                                                                   |
| Perseverance of Effort  | 1–5            | .61 (Sulla et al., 2018)                                                    | .67                                                                   |
| Sociability             | 1–7            | .86 (Di Fabio & Palazzeschi, 2011)                                          | .71                                                                   |
| Achievement Emotions    | 1–5            | .90 for the negative, .87 for the positive (Mega et al., 2007)              | .87 for the negative, .85 for the positive, .88 for the overall score |
| Self-Regulated Learning | 1–5            | .76 for the overall score, .48–.79 for the subscales (De Beni et al., 2014) | .76 for the overall score, .58–.69 for the subscales                  |
| Learning Goals          | 0–1            | .78 (De Beni et al., 2014)                                                  | .74                                                                   |
| Academic Self-Efficacy  | 1–5            | .80 (De Beni et al., 2014)                                                  | .80                                                                   |
| Growth Mindset          | 1–6            | .88 (De Beni et al., 2014)                                                  | .92                                                                   |
| Anxiety and Resilience  | 1–5            | .86 for anxiety, .76 for resilience (De Beni et al., 2014)                  | .89 for anxiety, .70 for resilience, .86 for the overall score        |
| General distress        | 0–3            | .90 for the overall score (Bottesi et al., 2015)                            | .94                                                                   |

**Table S2**

*Complete Results for the Two CFAs Assessing the Second-Order Factors, i.e., Soft Skills and Motivational Beliefs*

| Latent variable      | Observed variable        | Standardized loading | Standard error |
|----------------------|--------------------------|----------------------|----------------|
| Soft skills          | → Epistemic curiosity    | .60                  | .16            |
|                      | → Creativity             | .72                  | .21            |
|                      | → Critical thinking      | .53                  | .22            |
|                      | → Perseverance of effort | .27                  | .11            |
|                      | → Sociability            | .52                  | .24            |
| Motivational beliefs | → Academic self-efficacy | .61                  | .40            |
|                      | → Growth mindset         | .35                  | .56            |
|                      | → Learning goals         | .42                  | .13            |
